# Supplementary material
Source: HighWire-hosted journal article supplement (https://openheart.bmj.com/content/8/1/e001619)
Supplement: inline-supplementary-material-3 [file inline-supplementary-material-3.pdf]

**Supplementary Table 1.** Baseline characteristics according to ischemic burden

|                                         | Non-extensive ischemic burden<br>(n=5,231) |                  |         | Extensive ischemic burden<br>(n=1,006) |                |         |
|-----------------------------------------|--------------------------------------------|------------------|---------|----------------------------------------|----------------|---------|
|                                         | Women<br>(n=2,092)                         | Men<br>(n=3,139) | p-value | Women<br>(n=279)                       | Men<br>(n=727) | p-value |
| <b>Demographics and medical history</b> |                                            |                  |         |                                        |                |         |
| Age (years)                             | 68 ± 11                                    | 63 ± 12          | <0.001  | 69 ± 10                                | 66 ± 10        | <0.001  |
| Diabetes, n (%)                         | 568 (27.1)                                 | 828 (26.4)       | 0.536   | 121 (43.4)                             | 269 (37.0)     | 0.063   |
| Hypertension, n (%)                     | 1,413 (67.5)                               | 1,947 (62.0)     | <0.001  | 211 (75.6)                             | 508 (70.0)     | 0.071   |
| Hypercholesterolemia, n (%)             | 1,221 (58.4)                               | 1,691 (53.9)     | 0.001   | 185 (66.3)                             | 478 (65.7)     | 0.867   |
| Current smoker, n (%)                   | 241 (11.5)                                 | 693 (22.1)       | <0.001  | 34 (12.2)                              | 171 (23.5)     | <0.001  |
| Family history of IHD, n (%)            | 113 (5.4)                                  | 157 (5.0)        | 0.522   | 13 (4.7)                               | 40 (5.5)       | 0.592   |
| Previous IHD, n (%)                     | 478 (22.8)                                 | 1,268 (40.4)     | <0.001  | 136 (48.7)                             | 475 (65.3)     | <0.001  |
| Previous MI, n (%)                      | 207 (9.9)                                  | 633 (20.2)       | <0.001  | 77 (27.6)                              | 247 (34.0)     | 0.053   |
| Previous revascularization, n (%)       | 198 (9.5)                                  | 688 (21.9)       | <0.001  | 49 (17.5)                              | 198 (27.2)     | 0.001   |
| <b>ECG</b>                              |                                            |                  |         |                                        |                |         |
| ST-segment depression, n (%)            | 66 (3.1)                                   | 81 (2.6)         | 0.218   | 13 (4.7)                               | 29 (4.0)       | 0.634   |
| T-wave inversion, n (%)                 | 159 (7.6)                                  | 218 (6.9)        | 0.369   | 33 (11.8)                              | 61 (8.4)       | 0.094   |
| LBBB, n (%)                             | 168 (8.0)                                  | 162 (5.2)        | <0.001  | 19 (6.8)                               | 24 (3.3)       | 0.014   |
| <b>CMR indexes</b>                      |                                            |                  |         |                                        |                |         |
| LVEF (%)                                | 67 ± 12                                    | 61 ± 13          | <0.001  | 60 ± 15                                | 53 ± 14        | <0.001  |
| LVEDVI, mL/m <sup>2</sup>               | 66 ± 22                                    | 74 ± 26          | <0.001  | 74 ± 24                                | 85 ± 30        | <0.001  |
| LVESVI, mL/m <sup>2</sup>               | 24 ± 19                                    | 32 ± 22          | <0.001  | 32 ± 21                                | 43 ± 26        | <0.001  |
| <b>Revascularization procedures</b>     |                                            |                  |         |                                        |                |         |

|                                      |          |           |        |           |            |       |
|--------------------------------------|----------|-----------|--------|-----------|------------|-------|
| CMR-related revascularization, n (%) | 81 (3.9) | 219 (7.0) | <0.001 | 80 (20.3) | 203 (27.9) | 0.813 |
| CMR-related PCI, n (%)               | 69 (3.3) | 178 (5.7) | <0.001 | 56 (20.1) | 145 (19.9) | 0.964 |
| CMR-related CABG, n (%)              | 13 (0.6) | 44 (1.4)  | 0.008  | 25 (9.0)  | 61 (8.4)   | 0.772 |

CABG: coronary artery by-pass graft; CMR: cardiovascular magnetic resonance; IHD: ischemic heart disease; LBBB: left bundle branch block; LV: left ventricle; LVEDVI: left ventricle end-diastolic volume index; LVESVI: left ventricle end-systolic volume index; LVEF: left ventricular ejection fraction; MI: myocardial infarction; PCI: percutaneous coronary revascularization.

Continuous values are expressed as mean  $\pm$  SD.
