# Supplementary material
Source: HighWire-hosted journal article supplement (https://openheart.bmj.com/content/8/1/e001619)

**Suppl Figure 2.** Related coronary angiography rates across ischemic burden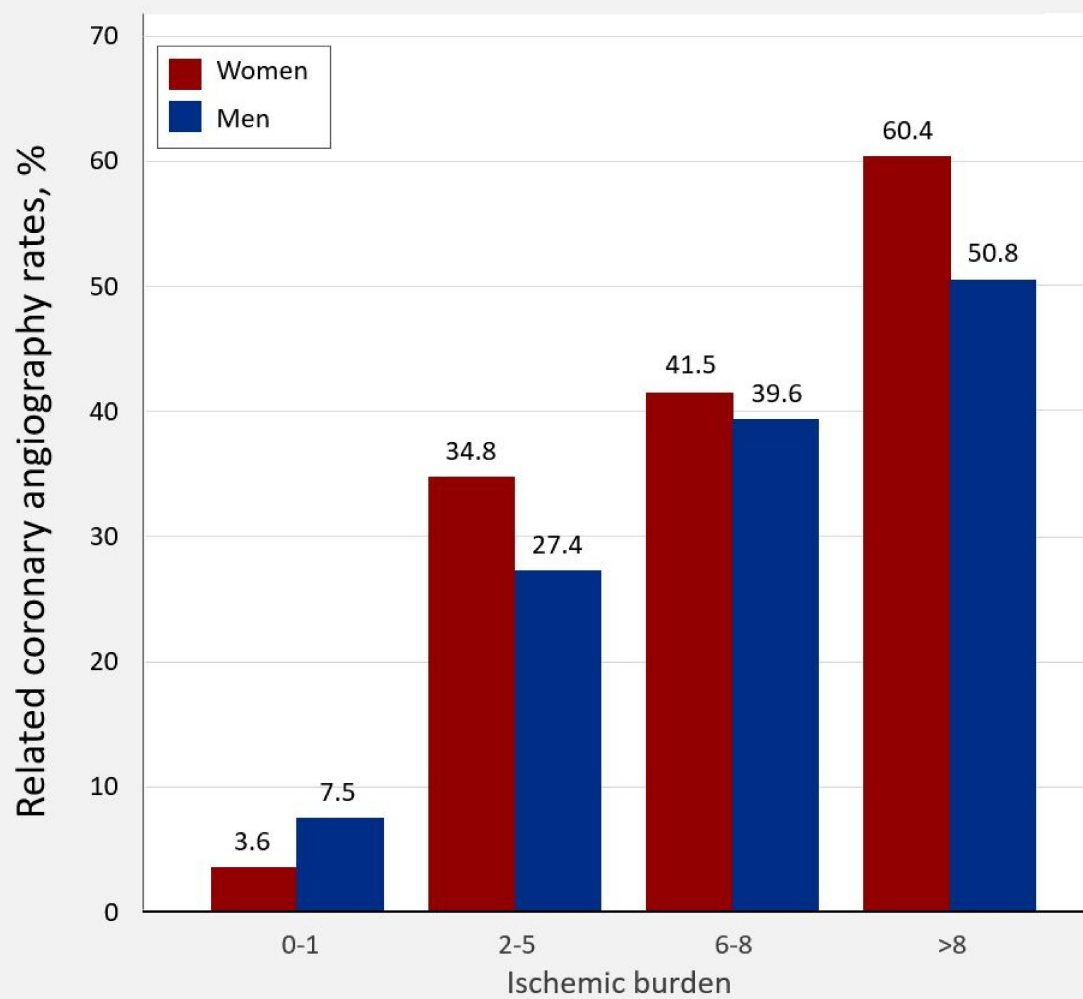

|         |           |           |         |         |
|---------|-----------|-----------|---------|---------|
| Women:  | 60/1,649  | 154/433   | 76/183  | 58/96   |
| Men:    | 156/2,071 | 293/1,068 | 189/477 | 127/250 |
| p-value | <0.001    | 0.004     | 0.655   | 0.108   |

Supplement: inline-supplementary-material-4 [file inline-supplementary-material-4.pdf]

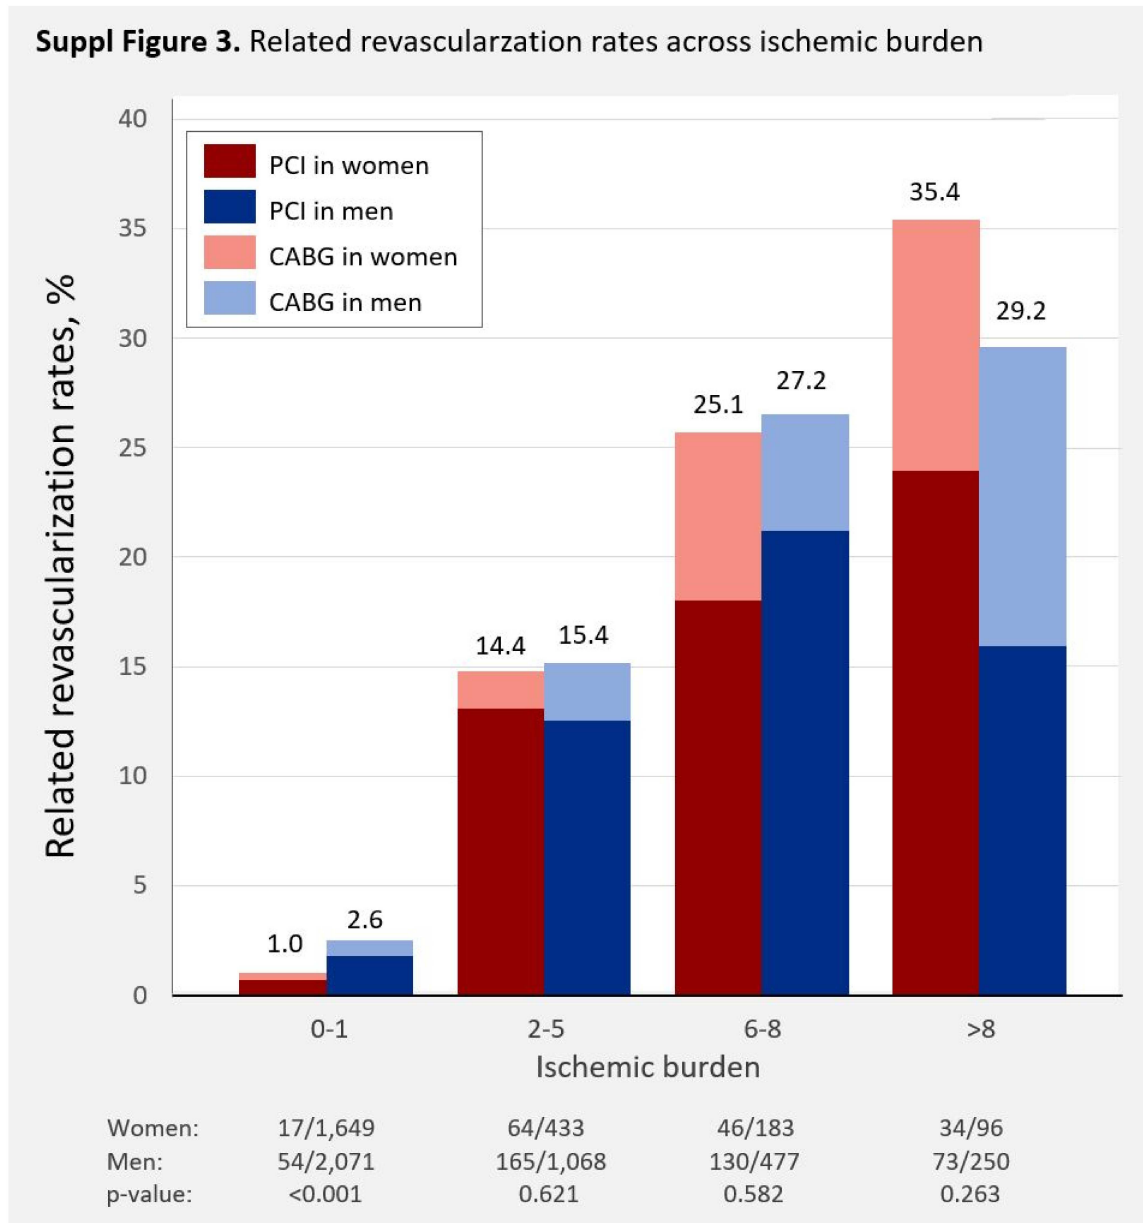

CABG: coronary-artery bypass graft surgery; PCI: percutaneous coronary intervention.

Supplement: inline-supplementary-material-5 [file inline-supplementary-material-5.pdf]
